# Supplementary material for: Enhanced Zn2+ion-sensing behavior of a benzothiazole derivative on encapsulation by β-cyclodextrin
Source: Royal Society of Chemistry journal article supplement (doi:10.1039/c6ra01202g), 2016-01-01
Supplement: c6ra01202g1.pdf [file c6ra01202g1.pdf]

## Supporting Information

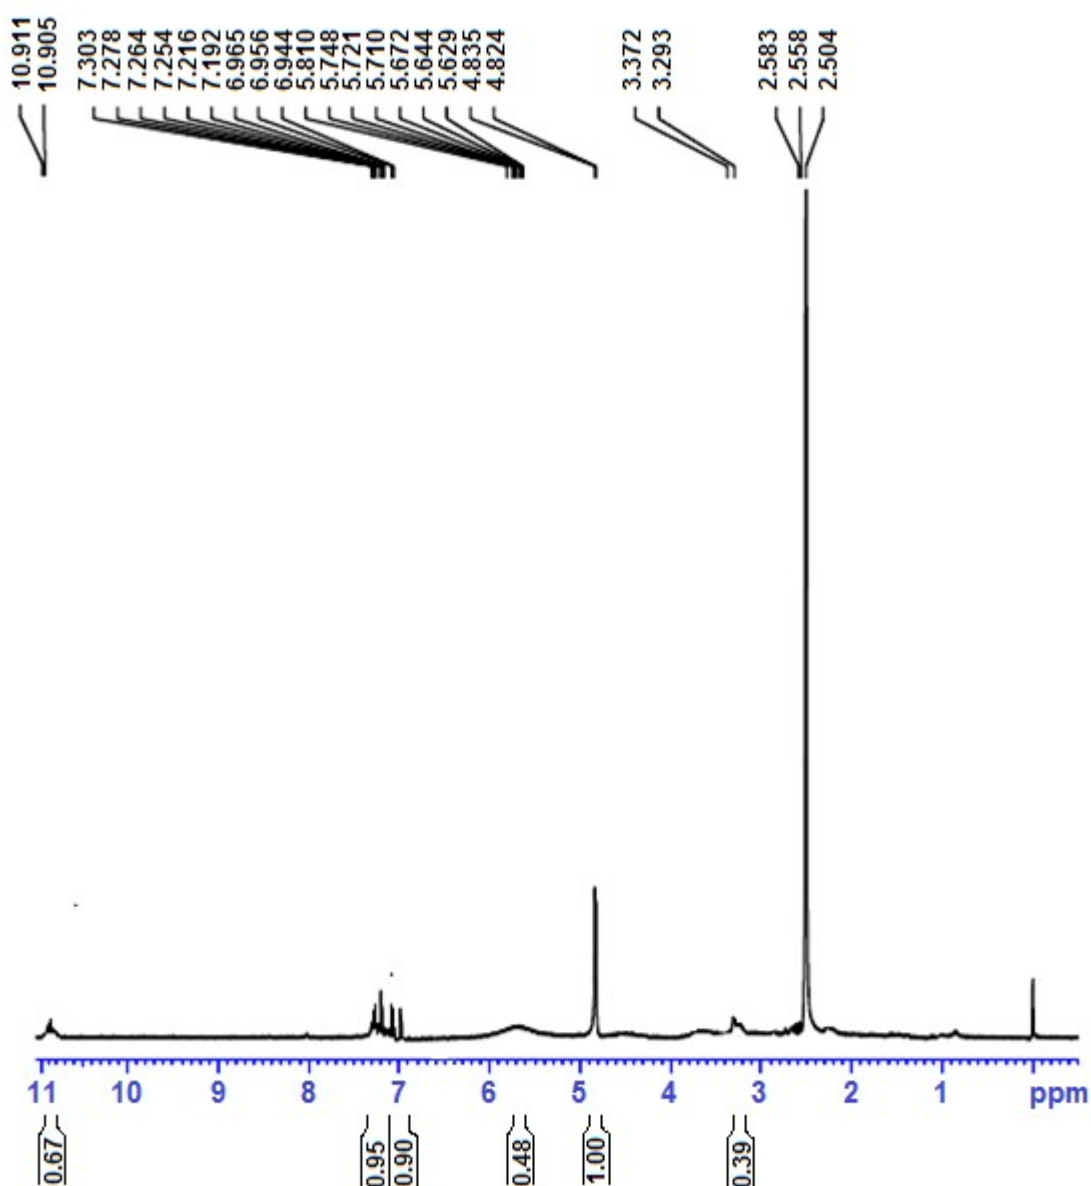

SI1 (a)  $^1\text{H}$  NMR Spectrum of Compound 1.

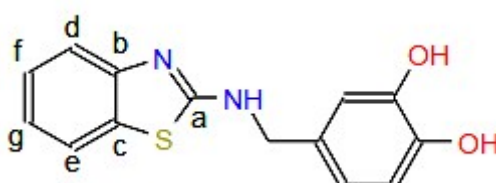

| Chemical shift (ppm) | Proton                                                    |
|----------------------|-----------------------------------------------------------|
| 4.824                | Methylene protons of the $-\text{NH}-\text{CH}_2-$ bridge |
| 5.672                | NH proton                                                 |
| 6.944 – 7.303        | Aromatic protons                                          |
| 10.905 and 10.911    | Phenolic OH protons                                       |

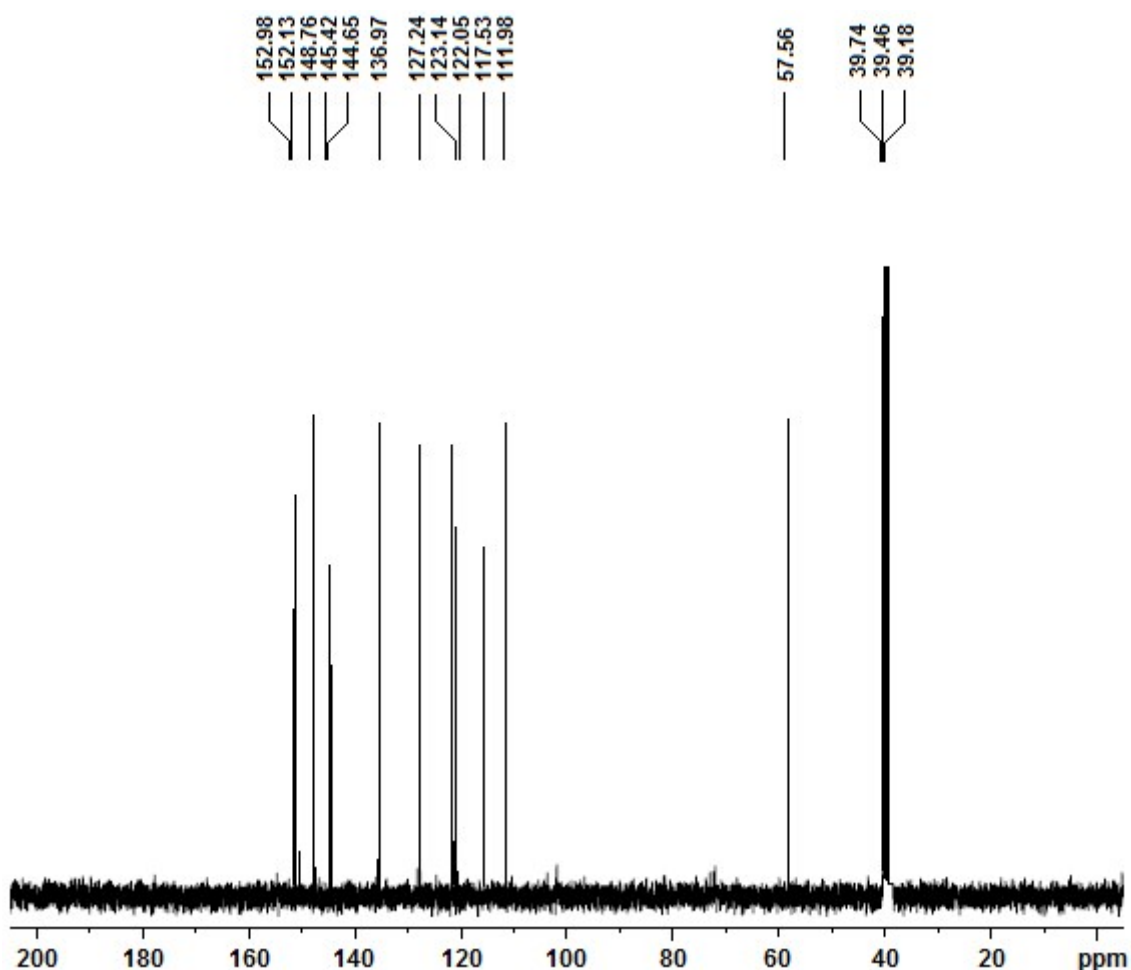

**SI2.**  $C^{13}$  NMR Spectrum of Compound 1.

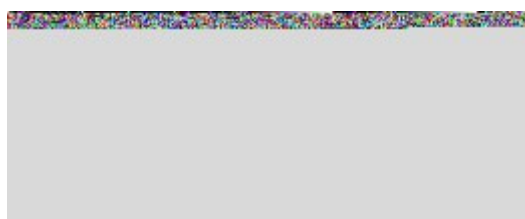

| Chemical shift (ppm) | Carbon                                      |
|----------------------|---------------------------------------------|
| 57.56                | Methylene carbons of the $-NH-CH_2-$ bridge |
| 111.98, 117.53       | Aromatic carbons of the phenolic ring       |
| 144.65, 145.47       | Aromatic carbons carrying phenolic OH       |
| 152.98               | Carbon 'a' of the benzothiazole ring        |
| 152.13               | Carbon 'b'                                  |
| 148.76               | Carbon 'c'                                  |
| 120 – 137            | Carbons 'd', 'e', 'f', 'g'                  |

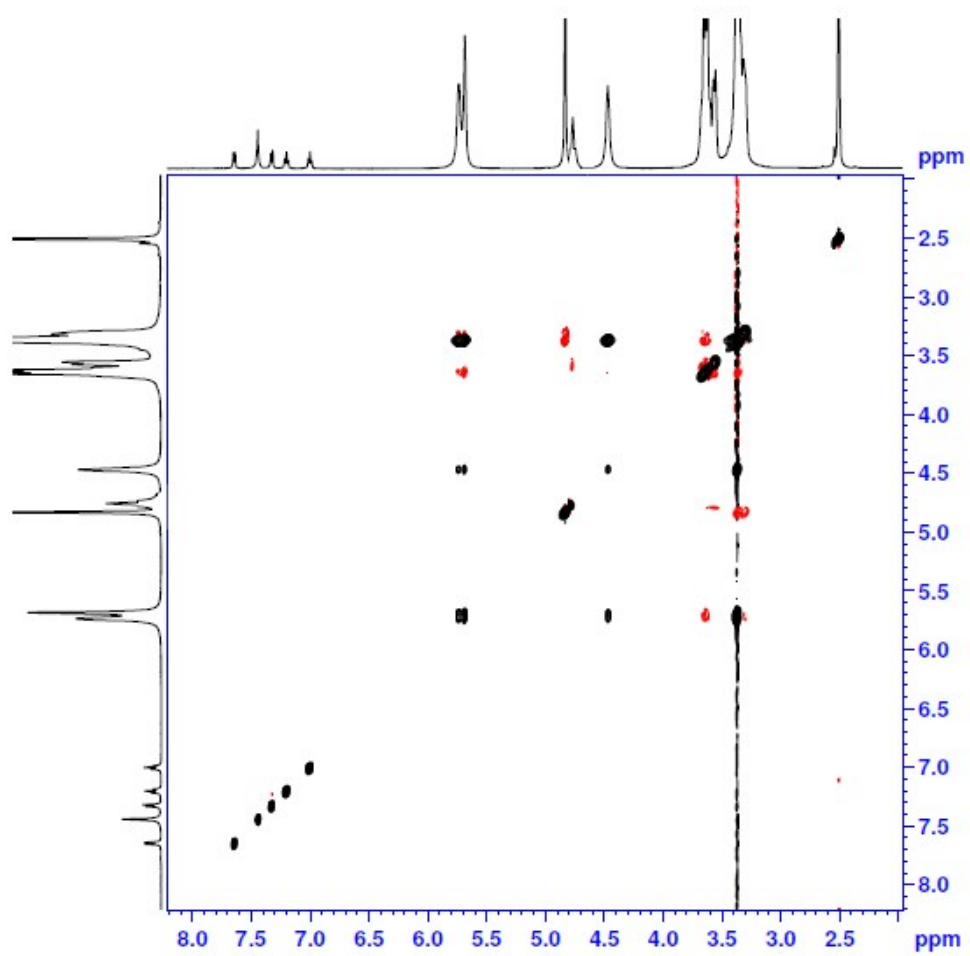

SI3. 2D ROESY Spectrum of Compound 1- $\beta$ -CD complex.

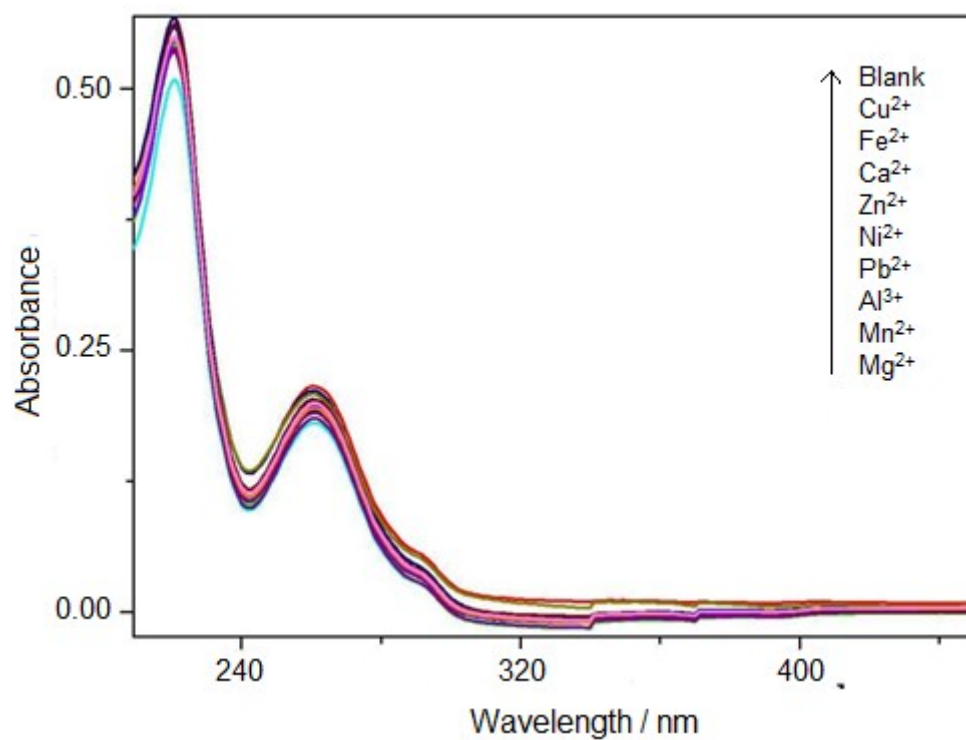

**SI4.** Absorption spectra of various metal ion added–Compound 1.

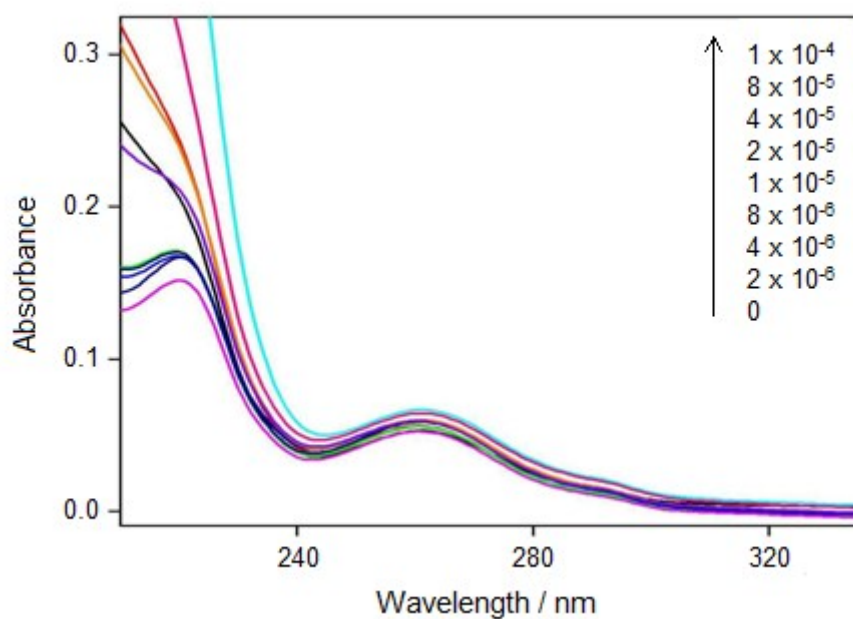

**SI5.** (a). Absorption spectra used for the Job's plot of **1**–Zn<sup>2+</sup> binding in HEPES.

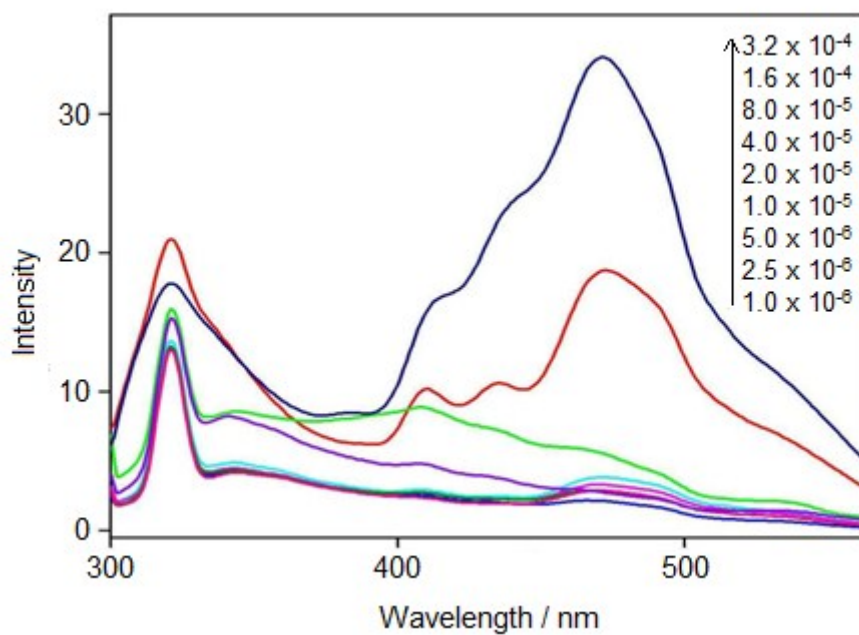

SI5. (b). Fluorescence spectra used for the Job's plot of **1**-Zn<sup>2+</sup> binding in HEPES.

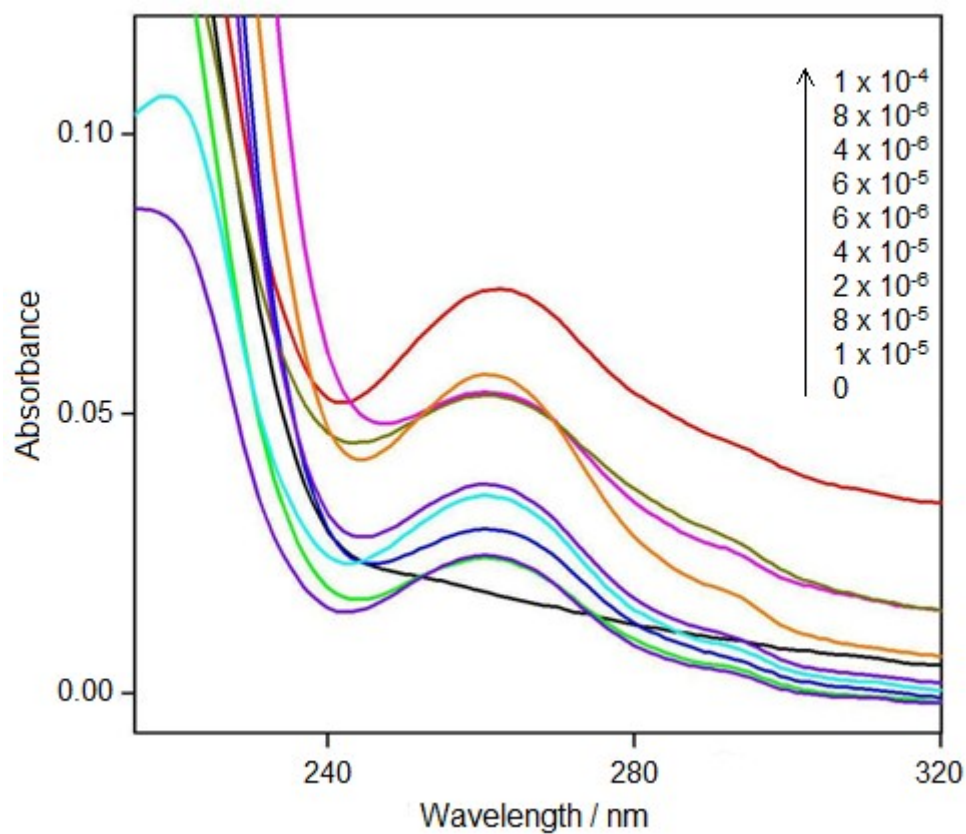

SI6. (a). Absorption spectra used for the Job's plot of **1**-Zn<sup>2+</sup> binding in  $\beta$ -CD.

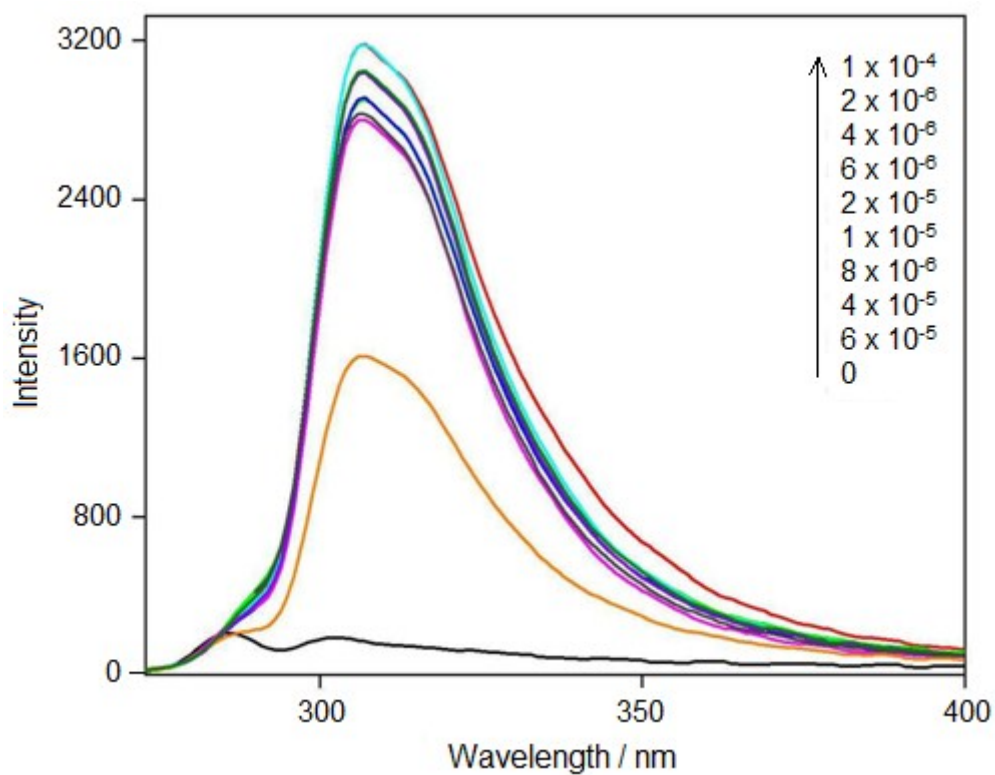

SI6. (b). Fluorescence spectra used for the Job's plot of **1**-Zn<sup>2+</sup> binding in  $\beta$ -CD.

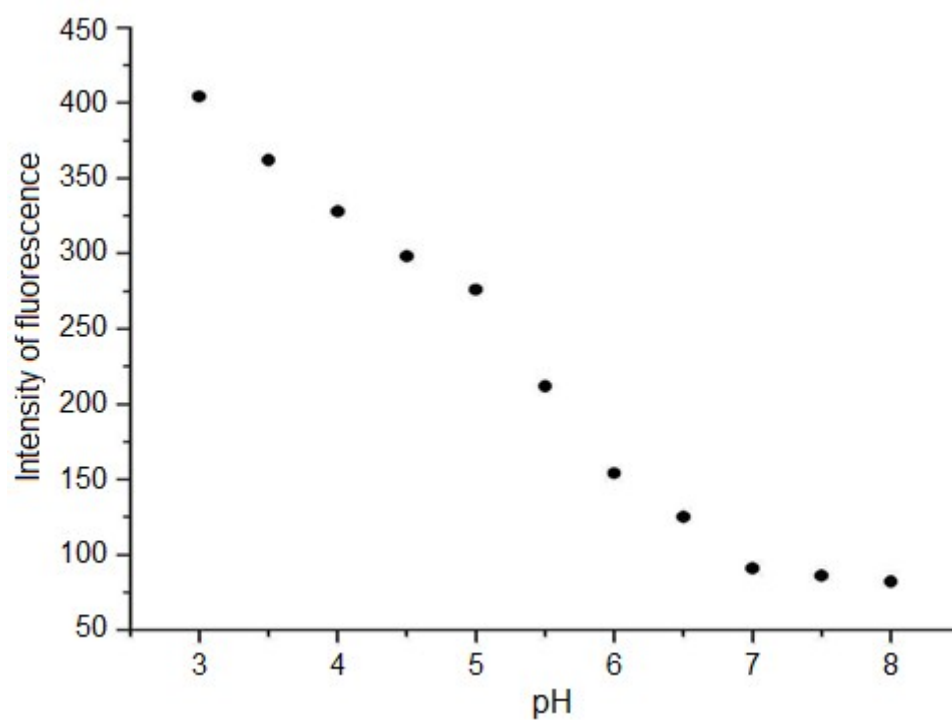

SI7. Effect of pH on the fluorescence intensity of **1**.
